# Supplementary material for: Examining the Association between Trait Mindfulness and Distress in Response to a Repeated CO2 Challenge
Source: Springer Nature journal article supplement (doi:10.1007/s12671-017-0832-9), 2017-10-28
Supplement: MOESM1 [file 15175138]

Table S1. *Zero-order correlations between trait mindfulness facets (FFMQ) and distress indices for each administration of the CO2 task (n=93).*

| ***Session 1*** |  | Baseline | Mask | CO2 | Recovery |
| --- | --- | --- | --- | --- | --- |
| SUDS | Describing | -.26* | -.09 | -.14 | -.19 |
|  | Non-judging | -.19 | -.31** | -.15 | -.29* |
|  | Non-reacting | -.11 | -.06 | -.20 | -.22* |
|  | Acting with awareness | -.17 | -.07 | -.06 | -.22 |
|  | Observing | -.18 | -.02 | -.21* | -.16 |
| DSQ Phys/Fear | Describing | -.21* | -.31** | -.20 | -.14 |
|  | Non-judging | -.32** | -.49** | -.24* | -.21 |
|  | Non-reacting | -.08 | -.18 | -.19 | -.30** |
|  | Acting with awareness | -.28** | -.29** | -.15 | -.30** |
|  | Observing | -.16 | -.08 | .004 | .09 |
| DSQ Cog | Describing | -.14 | -.22* | -.10 | .02 |
|  | Non-judging | -.39** | -.33** | -.10 | -.04 |
|  | Non-reacting | -.21* | -.24* | -.16 | -.31** |
|  | Acting with awareness | -.28** | -.22* | -.01 | -.17 |
|  | Observing | -.03 | -.05 | .02 | .13 |
| ***Session 2*** |  | Baseline | Mask | CO2 | Recovery |
| SUDS | Describing | -.06 | -.03 | -.07 | -.25* |
|  | Non-judging | -.03 | -.06 | -.14 | -.22 |
|  | Non-reacting | -.06 | .02 | -.20 | -.18 |
|  | Acting with awareness | -.07 | .01 | .04 | -.17 |
|  | Observing | .12 | -.04 | -.06 | .07 |
| DSQ Phys/Fear | Describing | -.11 | -.04 | -.22 | -.02 |
|  | Non-judging | -.22* | -.29** | -.27* | -.36** |
|  | Non-reacting | -.09 | -.08 | -.20 | -.28* |
|  | Acting with awareness | -.21* | -.10 | -.12 | -.07 |
|  | Observing | .06 | .06 | -.02 | .29* |
| DSQ Cog | Describing | -.003 | .04 | -.03 | .08 |
|  | Non-judging | -.04 | -.08 | -.24* | -.06 |
|  | Non-reacting | -.26* | -.17 | -.11 | -.24* |
|  | Acting with awareness | -.20 | -.09 | -.03 | .06 |
|  | Observing | -.02 | .05 | .03 | .22 |

***p* < .01, **p* < .05

*Note.* FFMQ *=* Five Facet Mindfulness Questionnaire;SUDS = subjective units of distress; DSQ Phys/Fear = Diagnostic Symptom Questionnaire physical and fear symptoms; DSQ Cog = Diagnostic Symptom Questionnaire threat cognitions.

Table S2. *Zero-order correlations between all mindfulness variables and anxiety sensitivity.*

|  | Non-judging | Non-reacting | Acting with Awareness | Observing | Anxiety Sensitivity |
| --- | --- | --- | --- | --- | --- |
| Describing | .38** | .28** | .33** | .35** | -.16 |
| Non-judging |  | .22* | .44** | -.06 | -.51** |
| Non-reacting |  |  | .27** | .32** | -.07 |
| Acting with Awareness |  |  |  | .12 | -.29** |
| Observing |  |  |  |  | .05 |

***p* < .01, **p* < .05
